# Supplementary material for: Cumulative Effect of Head Injuries on Nonmotor Outcomes in Parkinson’s Disease
Source: Atypon-hosted journal article supplement (doi:10.1176/appi.neuropsych.21100257), 2022-09-21
Supplement: appi.neuropsych.21100257.ds001.pdf [file appi.neuropsych.21100257.ds001.pdf]

**Supplemental Figure 1.**

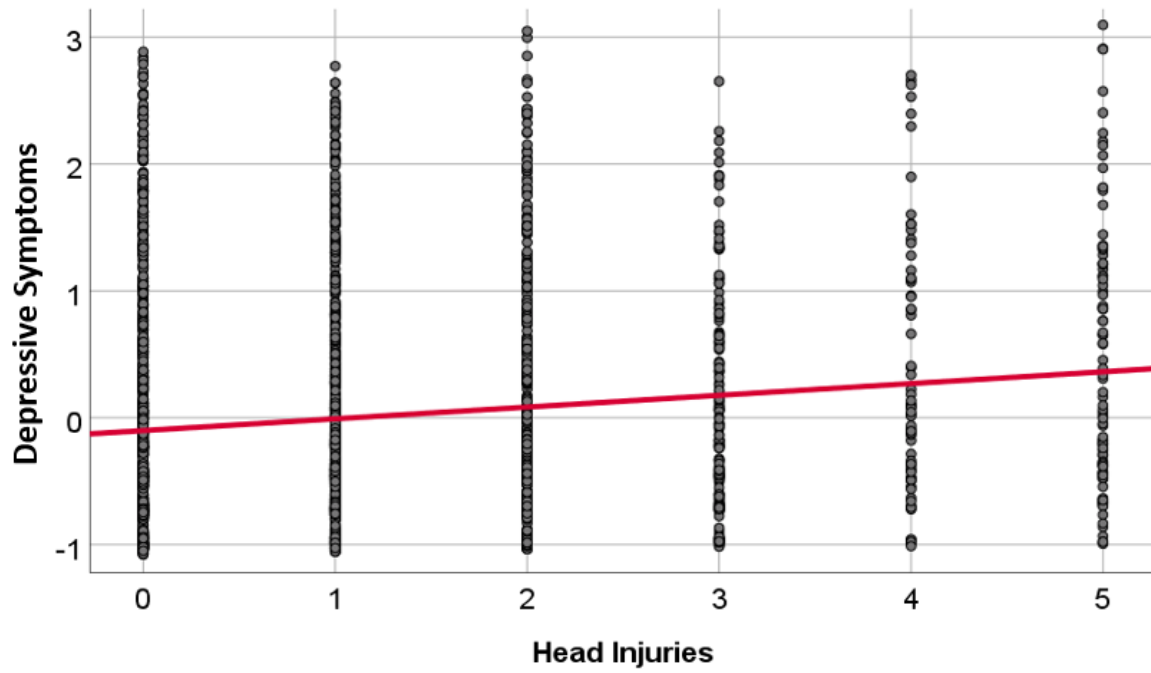

Association between Depression and Number of Head Injuries. Depression depicted in a z-metric. Depression measured by the Geriatric Depression Scale- Short Form

**Supplemental Figure 2.**

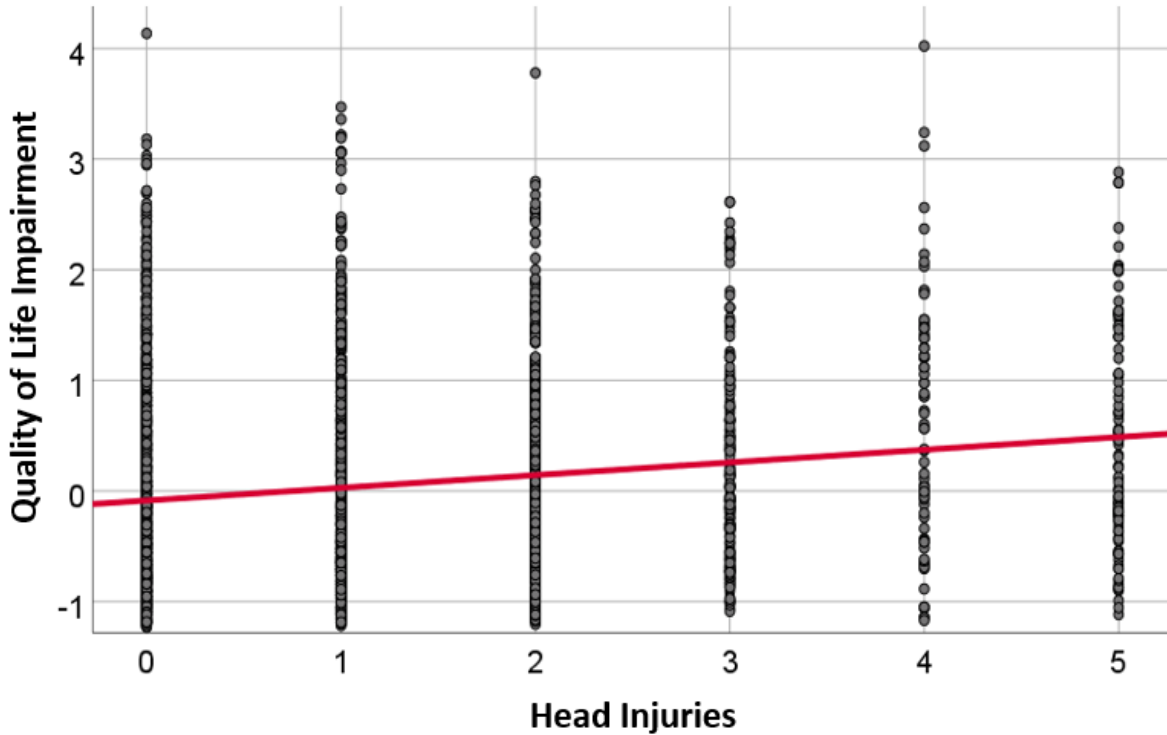

Association between Quality of Life and Number of Head Injuries. Quality of life depicted in a z-metric with higher scores indicating greater difficulties with quality of life.

**Supplemental Table 1.**

*Head injury Threshold and Cognitive Complaints*

| Parameter                | <i>B</i> | <i>p</i>         |
|--------------------------|----------|------------------|
| Number of Head Injuries* |          |                  |
| Single                   | 0.04     | 0.266            |
| Two                      | -0.01    | 0.882            |
| Three                    | -0.05    | 0.478            |
| Four                     | -0.15    | 0.133            |
| Five or more             | -0.20    | <b>0.018</b>     |
| Motor Symptom Severity   | 0.53     | <b>&lt;0.001</b> |
| Occasion                 | -0.08    | <b>&lt;0.001</b> |
| Age at Baseline          | 0.01     | 0.794            |
| Male Gender              | -0.02    | 0.632            |

Reference group = individuals reporting no history of head injuries.
